# Supplementary material
Source: publisher figshare collection journal article supplement (https://acs.figshare.com/ndownloader/files/4777069)
Supplement: Supplementary file 1 [file 4777069]

# Figure S1

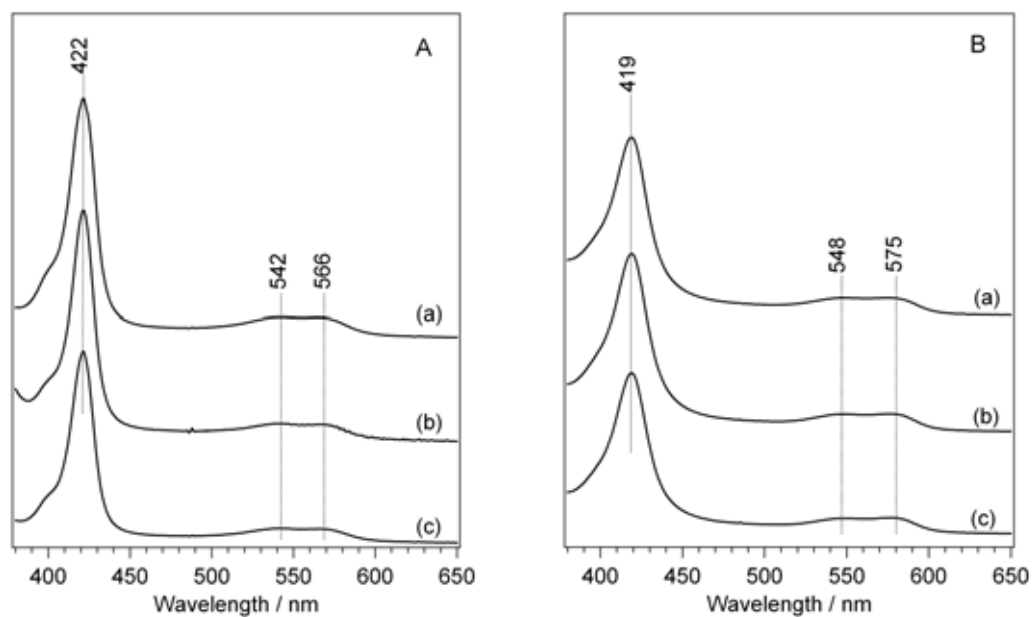

Figure S1. Electronic absorption spectra of (A) CO-bound and (B) NO-bound HemAT-Bs. (a) WT, (b) T95A, and (c) Y70F HemAT-Bs

# Figure S2

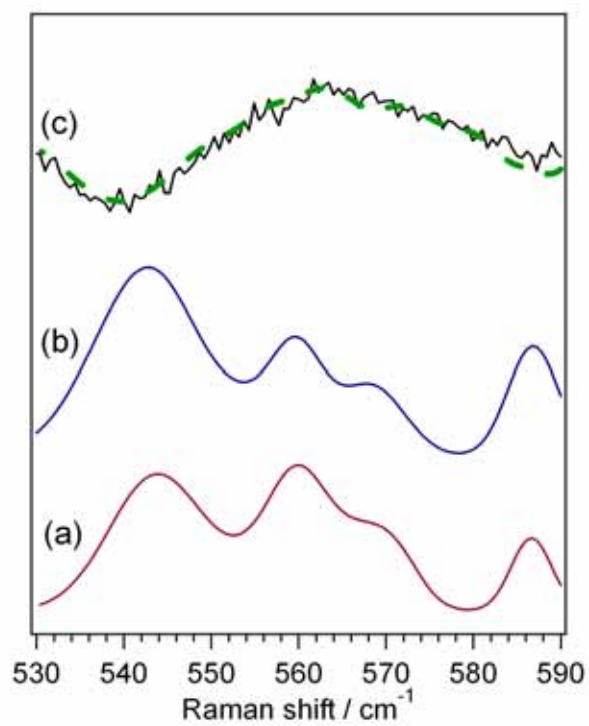

Figure S2. The fitting curve of the resonance Raman spectra of (a)  $^{16}\text{O}_2$ -bound, and (b)  $^{18}\text{O}_2$ -bound H86A HemAT-Bs. The different spectrum of these fitting curves (broken line in (c)) is almost same with the difference spectra of the raw spectra (solid line in (c)).
